# Supplementary material for: Pregnancy Achievement by Medical Assisted Reproduction Is Correlated to the G Protein-Coupled Receptor 30 mRNA Abundance in Human Spermatozoa
Source: MDPI journal article supplement (doi:10.3390/app12073240), 2022-03-22
Supplement: s1 [file s1]

Supplemental material for "Pregnancy achievement by medical assisted reproduction is correlated to the G protein-coupled receptor 30 mRNA abundance in human spermatozoa" by Pereira SC *et al*, 2022

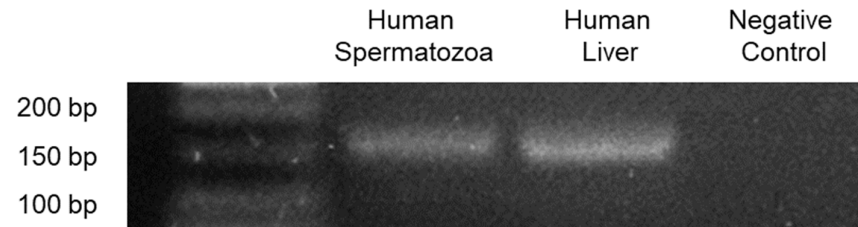

**Figure S1:** Identification of the *GPR30* transcript (~156 bp) in human spermatozoa through conventional polymerase chain reaction. A cDNA-free sample was used as a negative control. A human liver sample was used as a positive control.

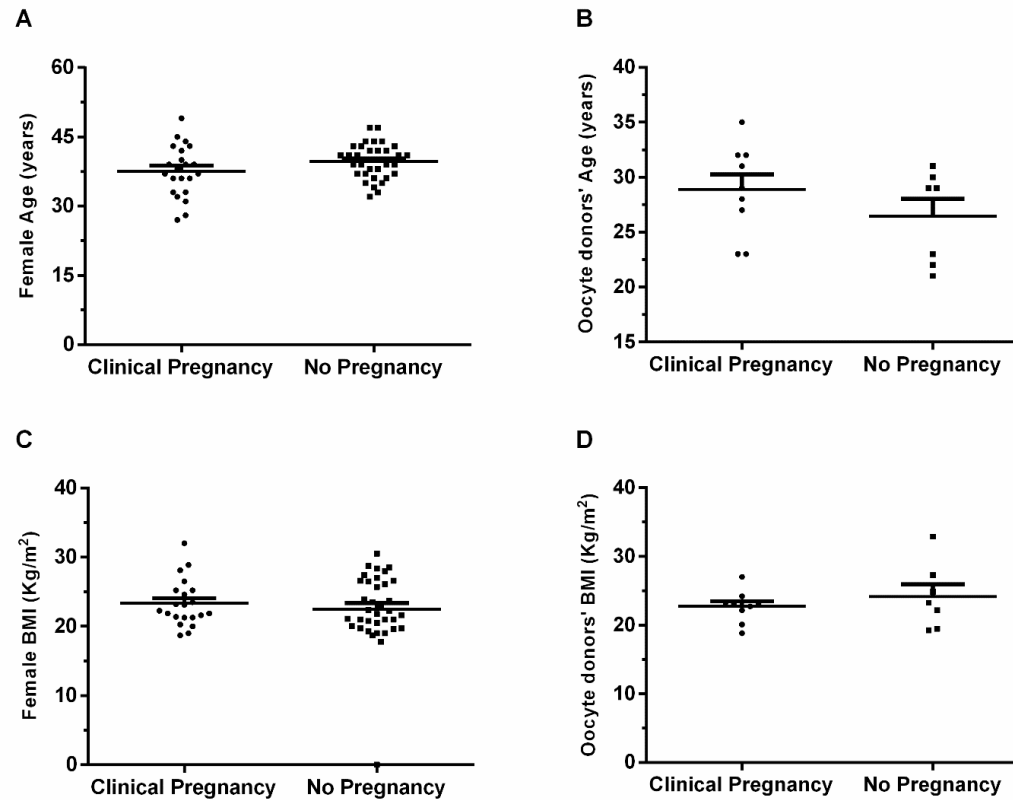

**Figure S2: Association between the Age and BMI of females and oocyte donors with the outcome of ART.** (A) From the total 60 embryo transfers, 22 women became clinically pregnant. The mean maternal age is represented in panel A, Clinical Pregnancy:  $38 \pm 2$  years old,  $n = 22$ ; No Pregnancy:  $40 \pm 1$  years old,  $n = 32$ . (B) 16 embryos from oocyte donations were transferred. 9 women became pregnant. The mean age of oocyte donors is represented in panel B, Clinical Pregnancy:  $29 \pm 1$  years old,  $n = 9$ ; No Pregnancy:  $26 \pm 2$  years old,  $n = 7$ . (C) The mean maternal BMI is represented in panel C, Clinical Pregnancy:  $23.3 \pm 0.7$  Kg/m<sup>2</sup>,  $n = 21$ ; No Pregnancy:  $22.5 \pm 0.9$  Kg/m<sup>2</sup>,  $n = 32$ . The mean BMI of oocyte donors is represented in panel D, Clinical Pregnancy:  $22.7 \pm 0.7$  Kg/m<sup>2</sup>,  $n = 9$ ; No Pregnancy:  $24.1 \pm 1.8$  Kg/m<sup>2</sup>,  $n = 7$ . All results are expressed as mean  $\pm$  standard error mean. Statistical analysis was performed by two-tailed Student's t-test for parametric data (confidence interval of 95%). No results were considered statistically significant.

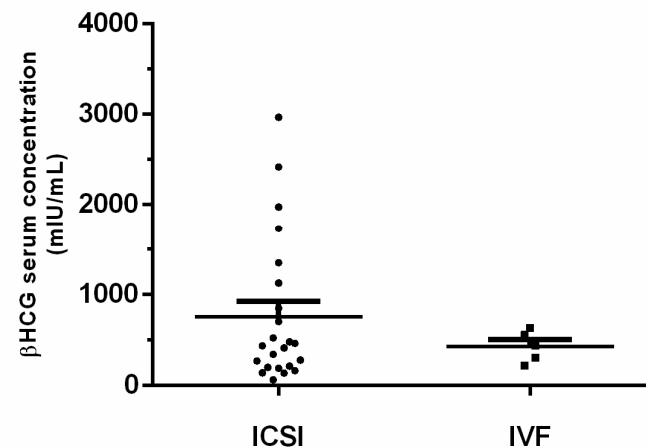

**Figure S3: Association between fertilization procedures (ICSI and IVF) with the outcome of ART.** From the total 60 embryo transfers, 28 women were reported to be biochemically pregnant after  $\beta$ HCG serum levels surpassed the value of 20 mIU/mL. ICSI was performed in 23 clinical cases,  $\beta$ HCG serum levels after embryo transfer:  $759.2 \pm 167.3$  mIU/mL,  $n = 23$ . IVF was performed in 5 cases,  $\beta$ HCG serum levels after embryo transfer:  $432.0 \pm 76.2$  mIU/mL,  $n = 5$ . The results are expressed as mean  $\pm$  standard error mean. Statistical analysis was performed by Two-tailed Student's t-test (for nonparametric data, Kolmogorov-Smirnov test). No results were considered statistically significant.

**Table S1: Clinical data from the participants of this study,** Age and body mass index (BMI) of the cohort of couples that underwent ART ( $n=81$ ), including the data of 16 females who donated oocytes used in 22 couples. Data are represented as mean  $\pm$  standard deviation.

| 81 couples | Male Age (Years) | Male BMI (Kg/m <sup>2</sup> ) | Female Age (Years) | Female BMI (Kg/m <sup>2</sup> ) | 22 oocyte donations from 16 different women | Oocyte donors Age (Years) | Oocyte donors BMI (Kg/m <sup>2</sup> ) |
|------------|------------------|-------------------------------|--------------------|---------------------------------|---------------------------------------------|---------------------------|----------------------------------------|
|            | 40 $\pm$ 5       | 26 $\pm$ 3                    | 39 $\pm$ 4         | 23 $\pm$ 4                      |                                             | 27 $\pm$ 4                | 23 $\pm$ 2                             |

**Table S2:** Cut-of-values analysis of several parameters (male BMI, male Age, and sperm-quality parameters) in relation to pregnancy (biochemical and clinical) and no pregnancy groups. Statistical analysis was performed by two-tailed Student's t-test for parametric data (confidence interval of 95%). Values of \*P<0.05 were considered as statistically significant.

|                   | Biochemical Pregnancy |       |        | No Pregnancy |       |        | <i>p</i> |
|-------------------|-----------------------|-------|--------|--------------|-------|--------|----------|
|                   | <i>n</i>              | MEAN  | SEM    | <i>n</i>     | MEAN  | SEM    |          |
| Male BMI          | 28                    | 26.43 | 0.5356 | 31           | 25.67 | 0.6421 | 0.3701   |
| Male Age          | 28                    | 37.32 | 0.9841 | 32           | 42.56 | 1.085  | 0.0008*  |
| Total sperm count | 28                    | 272.6 | 51.82  | 32           | 253.0 | 34.71  | 0.7502   |
| Total Motility    | 24                    | 60.08 | 3.922  | 31           | 60.71 | 3.389  | 0.9040   |
| Vitality          | 26                    | 67.31 | 3.226  | 29           | 65.55 | 3.140  | 0.6985   |
| Normal Morphology | 28                    | 5.679 | 0.8684 | 31           | 6.161 | 1.551  | 0.7929   |
|                   | Clinical Pregnancy    |       |        | No Pregnancy |       |        | <i>p</i> |
|                   | <i>n</i>              | MEAN  | SEM    | <i>n</i>     | MEAN  | SEM    |          |
| Male BMI          | 22                    | 26.27 | 0.5518 | 35           | 25.79 | 0.5929 | 0.5792   |
| Male Age          | 22                    | 37.18 | 1.135  | 36           | 41.86 | 1.032  | 0.0048*  |
| Total sperm count | 22                    | 292.0 | 59.28  | 35           | 261.4 | 34.78  | 0.6354   |
| Total Motility    | 19                    | 62.63 | 3.567  | 35           | 58.77 | 3.474  | 0.4784   |
| Vitality          | 20                    | 69.35 | 2.109  | 32           | 66.00 | 2.901  | 0.4108   |
| Normal Morphology | 21                    | 6.190 | 1.079  | 36           | 5.722 | 1.356  | 0.8122   |

**Table S3:** The association between *GPR30* mRNA abundance, and paternal age in couples that proceeded with embryo implantation (N=60). Statistical analysis was performed by computing Pearson correlation coefficients (r) assuming a Gaussian distribution (confidence interval of 95%). No correlations between the studied parameters were found to be statistically significant.

|                             | Male Age (Age) |         |          |
|-----------------------------|----------------|---------|----------|
|                             | <i>p</i>       | r       | <i>n</i> |
| <i>GPR30</i> mRNA abundance | 0.0780         | -0.2293 | 60       |
